# Supplementary material
Source: PubMed Central journal article supplement (PMC7094390)

**Supplemental Table S1.** Overall incidence rate of cases during the preweaning period (per 65.7 calf-days at risk).

| Reported Primary Clinical Sign       | Incidence rate |
|--------------------------------------|----------------|
| Digestive                            | 0.196          |
| Respiratory                          | 0.122          |
| Concurrent digestive and respiratory | 0.021          |
| Other*                               | 0.111          |
| Any                                  | 0.450          |

*\*Other included calves reported as only dull or dehydrated or febrile, and calves with reported infections, injuries, lameness, or neurological signs.*

**Supplemental Table S2.** Incidence rate of exclusive clinical cases per calf-month at risk

| Reported primary clinical sign       | Jan   | Feb   | Mar   | Apr   | May   | June  | July  | Aug   | Sept  | Oct   | Nov   | Dec   |
|--------------------------------------|-------|-------|-------|-------|-------|-------|-------|-------|-------|-------|-------|-------|
| Digestive                            | 0.055 | 0.076 | 0.062 | 0.081 | 0.038 | 0.049 | 0.047 | 0.062 | 0.05  | 0.042 | 0.052 | 0.086 |
| Respiratory                          | 0.045 | 0.032 | 0.062 | 0.044 | 0.041 | 0.03  | 0.032 | 0.025 | 0.019 | 0.041 | 0.028 | 0.031 |
| Concurrent digestive and respiratory | 0.007 | 0.003 | 0.002 | 0.008 | 0.002 | 0.008 | 0.003 | 0.004 | 0.006 | 0.012 | 0.004 | 0.003 |
| Other*                               | 0.053 | 0.051 | 0.049 | 0.051 | 0.034 | 0.025 | 0.041 | 0.039 | 0.025 | 0.042 | 0.010 | 0.045 |
| Any                                  | 0.159 | 0.163 | 0.174 | 0.184 | 0.115 | 0.113 | 0.124 | 0.130 | 0.101 | 0.137 | 0.094 | 0.165 |

\*Other included calves reported as only dull or dehydrated or febrile, and calves with reported infections, injuries, lameness, or neurological signs.

**Supplemental Table S3.** Incidence rates by exclusive cases per calf-week at risk from birth to weaning.  
\*Other included calves reported as only dull or dehydrated or febrile, and calves with reported infections,

| Clinical sign                        | Week 0 | Week 1 | Week 2 | Week 3 | Week 4 | Week 5 | Week 6 | Week 7 | Week 8 | Week 9 | Week 10 |
|--------------------------------------|--------|--------|--------|--------|--------|--------|--------|--------|--------|--------|---------|
| Digestive                            | 0.0051 | 0.0448 | 0.0727 | 0.0263 | 0.0090 | 0.0075 | 0.0055 | 0.0043 | 0.0020 | 0.0008 | 0.0000  |
| Respiratory                          | 0.0059 | 0.0098 | 0.0102 | 0.0086 | 0.0098 | 0.0169 | 0.0134 | 0.0122 | 0.0102 | 0.0047 | 0.0020  |
| Concurrent digestive and respiratory | 0.0012 | 0.0031 | 0.0039 | 0.0024 | 0.0008 | 0.0008 | 0.0024 | 0.0004 | 0.0000 | 0.0004 | 0.0004  |
| Other*                               | 0.0055 | 0.0306 | 0.0259 | 0.0177 | 0.0134 | 0.0094 | 0.0059 | 0.0047 | 0.0016 | 0.0024 | 0.0008  |

injuries, lameness, or neurological signs

**Supplemental Table S4.** Percent of heifer calves for all categorical variables initially included in morbidity univariate screening, by morbidity status. Bolded variables were considered for inclusion in the multivariable model ( $P$ -value < 0.20).

|                                 |                                 | Calves by reported morbidity (%) |            |                   |                    |                 |
|---------------------------------|---------------------------------|----------------------------------|------------|-------------------|--------------------|-----------------|
| Initial model variable          | Variable level                  | Calves (n)                       | Calves (%) | No disease events | Any disease events | <i>P</i> -value |
| All calves                      |                                 | 2374                             | 100.0%     | 66.1%             | 33.9%              |                 |
| Region*                         | East                            | 1495                             | 63.0%      | 62.5%             | 63.8%              | 0.879           |
|                                 | West                            | 879                              | 37.0%      | 37.5%             | 36.2%              |                 |
| Herd size                       | Small (30-99 cows)              | 314                              | 13.2%      | 13.4%             | 12.9%              | 0.904           |
|                                 | Medium (100-499 cows)           | 658                              | 27.7%      | 26.7%             | 29.7%              |                 |
|                                 | Large (500+ cows)               | 1402                             | 59.1%      | 59.9%             | 57.3%              |                 |
| Breed                           | Holstein                        | 2127                             | 89.6%      | 90.4%             | 88.1%              | 0.692           |
|                                 | Jersey                          | 101                              | 4.3%       | 3.9%              | 4.9%               |                 |
|                                 | Other                           | 142                              | 6.0%       | 5.4%              | 7.1%               |                 |
|                                 | Not reported                    | 4                                | 0.2%       | 0.3%              | 0.0%               |                 |
| Calving ease                    | Unassisted/easy extraction      | 2110                             | 88.9%      | 88.9%             | 88.8%              | 0.951           |
|                                 | Difficult/mechanical extraction | 112                              | 4.7%       | 5.0%              | 4.2%               |                 |
|                                 | Not reported                    | 152                              | 6.4%       | 6.1%              | 7.0%               |                 |
| Attendance at the calving event | Attended                        | 1186                             | 50.0%      | 49.7%             | 50.5%              | 0.918           |
|                                 | Unattended                      | 940                              | 39.6%      | 40.0%             | 38.8%              |                 |
|                                 | Not reported                    | 248                              | 10.4%      | 10.3%             | 10.7%              |                 |
| Single vs. twins                | Single                          | 2221                             | 93.6%      | 93.2%             | 94.3%              | 0.233           |
|                                 | Twin                            | 80                               | 3.4%       | 3.0%              | 4.1%               |                 |
|                                 | Not reported                    | 73                               | 3.1%       | 3.8%              | 1.6%               |                 |
| Navel disinfected               | Yes                             | 1822                             | 76.7%      | 77.3%             | 75.7%              | 0.645           |
|                                 | No                              | 513                              | 21.6%      | 20.5%             | 23.8%              |                 |
|                                 | Not reported                    | 39                               | 1.6%       | 2.2%              | 0.5%               |                 |
| Gender of the primary           | Male                            | 1438                             | 60.6%      | 62.4%             | 57.0%              | <b>0.015</b>    |

|                             |                       |      |       |       |       |              |
|-----------------------------|-----------------------|------|-------|-------|-------|--------------|
| caretaker                   | Female                | 806  | 34.0% | 30.8% | 40.0% |              |
|                             | Both                  | 130  | 5.5%  | 6.8%  | 3.0%  |              |
| Primary housing ventilation | Natural ventilation   | 1895 | 79.8% | 84.1% | 71.5% | <b>0.033</b> |
|                             | Other ventilation     | 479  | 20.2% | 15.9% | 28.5% |              |
| Housing number              | Groups less than 9    | 2223 | 93.6% | 95.5% | 89.9% | <b>0.111</b> |
|                             | Groups greater than 9 | 151  | 6.4%  | 4.5%  | 10.1% |              |

Calves by reported morbidity (%)

| Variable level                                              | Calves (n)              | Calves (%) | No disease events | Any disease events | <i>P</i> -value |
|-------------------------------------------------------------|-------------------------|------------|-------------------|--------------------|-----------------|
| Bedding                                                     | Straw/hay               | 1272       | 53.6%             | 51.6%              | 0.853           |
|                                                             | Shavings/woodchips      | 507        | 21.4%             | 22.4%              |                 |
|                                                             | None                    | 282        | 11.9%             | 12.9%              |                 |
|                                                             | Combination             | 313        | 13.2%             | 13.1%              |                 |
| Vaccines given during the preweaning period                 | Yes                     | 1534       | 64.6%             | 61.8%              | 0.075           |
|                                                             | No                      | 840        | 35.4%             | 38.2%              |                 |
| Antibiotic preventatives given during the preweaning period | Yes                     | 51         | 2.1%              | 2.9%               | 0.112           |
|                                                             | No                      | 2323       | 97.9%             | 96.9%              |                 |
| Dehorning/<br>disbudding                                    | Yes                     | 1194       | 50.3%             | 52.0%              | 0.470           |
|                                                             | No                      | 1081       | 45.5%             | 43.2%              |                 |
|                                                             | Not reported            | 99         | 4.2%              | 4.8%               |                 |
| Giardia                                                     | Positive                | 658        | 27.7%             | 28.8%              | 0.201           |
|                                                             | Negative                | 1518       | 63.9%             | 63.1%              |                 |
|                                                             | Not tested              | 198        | 8.3%              | 8.1%               |                 |
| Cryptosporidium                                             | Positive                | 940        | 39.6%             | 40.8%              | 0.532           |
|                                                             | Negative                | 1237       | 52.1%             | 51.2%              |                 |
|                                                             | Not Tested              | 197        | 8.3%              | 8.0%               |                 |
| Liquid diet type                                            | Whole/waste milk        | 1403       | 59.1%             | 55.2%              | 0.052           |
|                                                             | Any milk replacer       | 971        | 40.9%             | 44.8%              |                 |
| Direct fed microbial additives in the liquid diet           | Yes                     | 381        | 16.0%             | 13.4%              | 0.110           |
|                                                             | No                      | 1993       | 84.0%             | 86.5%              |                 |
| Evaluation of bacterial counts in the milk                  | Yes                     | 259        | 10.9%             | 9.8%               | 0.446           |
|                                                             | No                      | 1271       | 53.5%             | 56.6%              |                 |
|                                                             | Not applicable (fed MR) | 844        | 35.6%             | 33.6%              |                 |
| Additives in the milk                                       | Yes                     | 1246       | 52.5%             | 53.3%              | 0.529           |
|                                                             | No                      | 1128       | 47.5%             | 46.7%              |                 |
| Antibiotics in the milk                                     | Yes                     | 322        | 13.6%             | 13.1%              | 0.769           |

|                      |                            |      |       |       |       |       |
|----------------------|----------------------------|------|-------|-------|-------|-------|
|                      | No                         | 2052 | 86.4% | 86.9% | 85.4% |       |
|                      | Yes                        | 662  | 27.9% | 29.4% | 24.9% |       |
| Pasteurized milk     | No                         | 868  | 36.6% | 36.9% | 35.8% | 0.720 |
|                      | Not applicable<br>(fed MR) | 844  | 35.6% | 33.6% | 39.3% |       |
| Milk delivery system | Bottle                     | 597  | 25.1% | 28.7% | 18.3% | 0.390 |
|                      | Bucket/pail                | 358  | 15.1% | 14.1% | 16.9% |       |
|                      | Milk bar                   | 70   | 2.9%  | 2.3%  | 4.2%  |       |
|                      | Robotic                    | 47   | 2.0%  | 0.8%  | 4.4%  |       |
|                      | Bottle and bucket          | 1145 | 48.2% | 48.3% | 48.1% |       |
|                      | Other combination          | 157  | 6.6%  | 5.9%  | 8.1%  |       |

\* West region: California, Colorado, Washington; East region: Iowa, Michigan, Minnesota, Missouri, New York, Ohio, Pennsylvania, Vermont, Virginia, and Wisconsin

**Supplemental Table S5.** Continuous variables initially evaluated for morbidity of heifer calves. Bolded variables were included in the initial morbidity model (*P*-value less than 0.20)

| Variable                                         | Number of calves | Mean  | SE   | Percentile |       |       |       |       | Reported Morbidity |      |                    |     | <i>P</i> -value |
|--------------------------------------------------|------------------|-------|------|------------|-------|-------|-------|-------|--------------------|------|--------------------|-----|-----------------|
|                                                  |                  |       |      | 5th        | 25th  | 50th  | 75th  | 95th  | No disease events  |      | Any disease events |     |                 |
|                                                  |                  |       |      |            |       |       |       |       | Mean               | SE   | Mean               | SE  |                 |
| Birth weight (kg)                                | 2,374            | 42.63 | 0.11 | 34.04      | 39.09 | 42.73 | 45.91 | 52.27 | 42.88              | 0.14 | 42.1               | 0.2 | <b>0.067</b>    |
| Serum IgG                                        | 2,374            | 21.77 | 0.22 | 6.20       | 14.40 | 20.90 | 28.30 | 40.20 | 22.48              | 0.27 | 20.4               | 0.4 | <b>0.001</b>    |
| Amount of protein fed per day (kg)               | 2,374            | 0.20  | 0.00 | 0.10       | 0.14  | 0.17  | 0.23  | 0.35  | 0.19               | 0.00 | 0.2                | 0.0 | <b>0.185</b>    |
| Amount of fat fed per day (kg)                   | 2,374            | 0.21  | 0.00 | 0.10       | 0.15  | 0.19  | 0.24  | 0.33  | 0.20               | 0.00 | 0.2                | 0.0 | 0.385           |
| Average THI during the preweaning period (pTHI)* | 2,374            | 49.60 | 0.35 | 18.50      | 36.30 | 52.55 | 63.80 | 70.70 | 50.61              | 0.42 | 47.6               | 0.6 | <b>0.007</b>    |
| Average daily gain (kg)                          | 2,073            | 1.60  | 0.01 | 0.79       | 1.25  | 1.57  | 1.91  | 2.53  | 1.62               | 0.01 | 1.6                | 0.0 | 0.391           |

\**THI* provides an index that accounts for the effects of temperature and relative humidity, and the equation uses the dry bulb temperature (*T*, °F) and the relative humidity (*RH*). The equation for *THI* used for this analysis was:  $THI = T - (0.55 - (0.55 \times RH/100)) \times (T - 58)$ .



**Supplemental Table S6.** Percent of heifer calves for all categorical variables initially included in mortality univariate screening, by mortality status. Bolded variables were considered for inclusion in the multivariable model ( $P$ -value < 0.20).

| Initial model variable          | Variable level                  | Calves (n) | Calves (%) | Calves by reported mortality (%) |                     | <i>P</i> -value |
|---------------------------------|---------------------------------|------------|------------|----------------------------------|---------------------|-----------------|
|                                 |                                 |            |            | Died                             | Survived to weaning |                 |
| All calves                      |                                 | 2272       | 100.0%     | 5.00%                            | 95.00%              |                 |
| Region*                         | East                            | 1398       | 61.5%      | 53.2%                            | 61.95%              | 0.314           |
|                                 | West                            | 874        | 38.5%      | 46.8%                            | 38.05%              |                 |
| Herd size                       | Small (30-99 cows)              | 276        | 12.1%      | 10.1%                            | 12.25%              | 0.653           |
|                                 | Medium (100-499 cows)           | 637        | 28.0%      | 24.8%                            | 28.20%              |                 |
|                                 | Large (500+ cows)               | 1359       | 59.8%      | 65.1%                            | 59.55%              |                 |
| Breed                           | Holstein                        | 2025       | 89.1%      | 90.8%                            | 89.04%              | 0.777           |
|                                 | Jersey                          | 101        | 4.4%       | 4.6%                             | 4.44%               |                 |
|                                 | Other                           | 142        | 6.3%       | 4.6%                             | 6.33%               |                 |
|                                 | Not reported                    | 4          | 0.2%       | 0.0%                             | 0.18%               |                 |
| Calving ease                    | Unassisted/easy extraction      | 2017       | 88.8%      | 84.4%                            | 89.00%              | 0.454           |
|                                 | Difficult/mechanical extraction | 101        | 4.4%       | 2.8%                             | 4.72%               |                 |
|                                 | Not reported                    | 142        | 6.3%       | 12.8%                            | 6.29%               |                 |
| Single vs. twins                | Single                          | 2122       | 93.4%      | 91.7%                            | 93.48%              | 0.530           |
|                                 | Twin                            | 78         | 3.4%       | 1.8%                             | 3.51%               |                 |
|                                 | Not reported                    | 72         | 3.2%       | 17.4%                            | 3.01%               |                 |
| Navel disinfected               | Yes                             | 1734       | 76.3%      | 82.6%                            | 76.01%              | 0.307           |
|                                 | No                              | 499        | 22.0%      | 17.4%                            | 22.19%              |                 |
|                                 | Not reported                    | 39         | 1.7%       | 0.0%                             | 1.80%               |                 |
| Gender of the primary caretaker | Male                            | 1378       | 60.7%      | 63.3%                            | 60.52%              | 0.420           |
|                                 | Female                          | 769        | 33.8%      | 32.1%                            | 33.93%              |                 |
|                                 | Both                            | 125        | 5.5%       | 4.6%                             | 5.55%               |                 |
| Primary housing ventilation     | Natural ventilation             | 1839       | 80.9%      | 80.7%                            | 80.95%              | 0.718           |
|                                 | Other ventilation types         | 433        | 19.1%      | 19.3%                            | 19.05%              |                 |

|                |                       |      |       |       |        |       |
|----------------|-----------------------|------|-------|-------|--------|-------|
| Housing number | Groups less than 9    | 2121 | 93.4% | 95.4% | 93.25% | 0.201 |
|                | Groups greater than 9 | 151  | 6.6%  | 4.6%  | 6.75%  |       |

---

| Initial model variable                                                                                                                                                                | Variable level          | Calves (n) | Calves (%) | Calves by reported mortality (%) |                     | <i>P</i> -value |
|---------------------------------------------------------------------------------------------------------------------------------------------------------------------------------------|-------------------------|------------|------------|----------------------------------|---------------------|-----------------|
|                                                                                                                                                                                       |                         |            |            | Died                             | Survived to weaning |                 |
| Bedding<br>J. Dairy Sci. 101:9229–9244<br><a href="https://doi.org/10.3168/jds.2017-14019">https://doi.org/10.3168/jds.2017-14019</a><br>© American Dairy Science Association®, 2018. | Straw/hay               | 1203       | 52.9%      | 50.5%                            | 53.07%              | 0.533           |
|                                                                                                                                                                                       | Shavings/woodchips      | 472        | 20.8%      | 16.5%                            | 21.45%              |                 |
|                                                                                                                                                                                       | None                    | 282        | 12.4%      | 21.1%                            | 11.97%              |                 |
|                                                                                                                                                                                       | Combination             | 305        | 13.4%      | 11.9%                            | 13.50%              |                 |
| Vaccines given during the preweaning period                                                                                                                                           | Yes                     | 1463       | 64.4%      | 51.4%                            | 65.05%              | 0.087           |
|                                                                                                                                                                                       | No                      | 809        | 35.6%      | 48.6%                            | 34.95%              |                 |
| Antibiotic preventatives administered during the preweaning period                                                                                                                    | Yes                     | 51         | 2.2%       | 2.8%                             | 2.22%               | 0.714           |
|                                                                                                                                                                                       | No                      | 2221       | 97.8%      | 97.2%                            | 97.78%              |                 |
| Dehorning/disbudding                                                                                                                                                                  | Yes                     | 1145       | 50.4%      | 0.0%                             | 52.94%              | 0.470           |
|                                                                                                                                                                                       | No                      | 1028       | 45.2%      | 100.0%                           | 0.00%               |                 |
|                                                                                                                                                                                       | Not reported            | 99         | 4.4%       | 0.0%                             | 4.58%               |                 |
| Morbidity during the preweaning period                                                                                                                                                | Any disease             | 761        | 33.5%      | 68.8%                            | 68.28%              | <0.001          |
|                                                                                                                                                                                       | No disease              | 1511       | 66.5%      | 31.2%                            | 31.72%              |                 |
| Liquid diet type                                                                                                                                                                      | Whole/waste milk        | 1315       | 57.9%      | 55.0%                            | 58.02%              | 0.763           |
|                                                                                                                                                                                       | Any milk replacer       | 957        | 42.1%      | 45.0%                            | 41.98%              |                 |
| Kg of fat in liquid diet per day                                                                                                                                                      | ≤ 0.15 kg/day           | 686        | 30.2%      | 51.4%                            | 29.13%              | 0.028           |
|                                                                                                                                                                                       | 0.16-0.21 kg/day        | 765        | 33.7%      | 24.8%                            | 34.12%              |                 |
|                                                                                                                                                                                       | ≥0.22 kg/day            | 821        | 36.1%      | 23.9%                            | 36.75%              |                 |
| Direct fed microbial additives in the liquid diet                                                                                                                                     | Yes                     | 381        | 16.8%      | 11.0%                            | 17.06%              | 0.118           |
|                                                                                                                                                                                       | No                      | 1891       | 83.2%      | 89.0%                            | 82.94%              |                 |
| Any additives in the liquid diet                                                                                                                                                      | Yes                     | 1184       | 52.1%      | 43.1%                            | 52.57%              | 0.146           |
|                                                                                                                                                                                       | No                      | 1088       | 47.9%      | 56.9%                            | 1.20%               |                 |
| Antibiotics added in the liquid diet                                                                                                                                                  | Yes                     | 322        | 14.2%      | 8.3%                             | 14.47%              | 0.062           |
|                                                                                                                                                                                       | No                      | 1950       | 85.8%      | 91.7%                            | 85.53%              |                 |
| Evaluation of bacterial counts in the liquid diet                                                                                                                                     | Yes                     | 259        | 11.4%      | 11.0%                            | 11.42%              | 0.363           |
|                                                                                                                                                                                       | No                      | 1232       | 54.2%      | 46.8%                            | 54.60%              |                 |
|                                                                                                                                                                                       | Not applicable (fed MR) | 781        | 34.4%      | 42.2%                            | 33.98%              |                 |
| Pasteurized milk                                                                                                                                                                      | Yes                     | 662        | 29.1%      | 21.1%                            | 33.98%              | 0.137           |

|                      |                         |      |       |       |        |       |
|----------------------|-------------------------|------|-------|-------|--------|-------|
| Milk delivery system | No                      | 829  | 36.5% | 36.7% | 41.98% |       |
|                      | Not applicable (fed MR) | 781  | 34.4% | 42.2% | 24.04% |       |
|                      | Bottle                  | 589  | 25.9% | 35.8% | 25.43% |       |
|                      | Bucket/pail             | 357  | 15.7% | 11.9% | 15.90% |       |
|                      | Milk bar                | 24   | 1.1%  | 0.9%  | 1.06%  | 0.362 |
|                      | Robotic                 | 47   | 2.1%  | 1.8%  | 2.08%  |       |
|                      | Bottle and bucket       | 1104 | 48.6% | 46.8% | 48.68% |       |
|                      | Other combination       | 151  | 6.6%  | 2.8%  | 6.84%  |       |

\* *West region: California, Colorado, Washington; East region: Iowa, Michigan, Minnesota, Missouri, New York, Ohio, Pennsylvania, Vermont, Virginia, and Wisconsin*

**Supplemental Table S7.** Continuous variables initially evaluated for mortality of heifer calves. Bolded variables were included in the initial mortality model (*P*-value less than 0.20)

| Initial model variable                           | No. of calves | Mean | SE  | Percentile |      |      |      |      | Reported mortality |     |                     |     | <i>P</i> -value |
|--------------------------------------------------|---------------|------|-----|------------|------|------|------|------|--------------------|-----|---------------------|-----|-----------------|
|                                                  |               |      |     | 5th        | 25th | 50th | 75th | 95th | Died               |     | Survived to weaning |     |                 |
|                                                  |               |      |     |            |      |      |      |      | Mean               | SE  | Mean                | SE  |                 |
| Birth weight (kg)                                | 2,272         | 42.6 | 0.1 | 33.9       | 39.1 | 42.7 | 45.9 | 52.3 | 41.0               | 0.6 | 42.6                | 0.1 | <b>0.033</b>    |
| Serum IgG (g/L)                                  | 2,272         | 21.8 | 0.2 | 6.2        | 14.5 | 21.0 | 28.4 | 40.1 | 17.7               | 1.1 | 22.0                | 0.2 | <b>0.002</b>    |
| Liquid diet protein per day (kg)                 | 2,272         | 0.2  | 0.0 | 0.1        | 0.1  | 0.2  | 0.2  | 0.3  | 0.2                | 0.0 | 0.2                 | 0.0 | <b>0.019</b>    |
| Average THI during the preweaning period (pTHI)* | 2,272         | 49.7 | 0.4 | 18.4       | 37.6 | 52.6 | 63.8 | 70.7 | 49.5               | 1.8 | 49.7                | 0.4 | <b>0.012</b>    |

\*THI provides an index that accounts for the effects of temperature and relative humidity, and the equation uses the dry bulb temperature (*T*, °F) and the relative humidity (*RH*). The equation for THI used for this analysis was:  $THI = T - (0.55 - (0.55 \times RH/100)) \times (T - 58)$ .

**Supplemental Figure S1.** Predicted morbidity risk for preweaned heifer calves by (a) birth weight (kg), (b) serum IgG (g/L), and (c) average monthly THI concentration grouped into 12 categories.

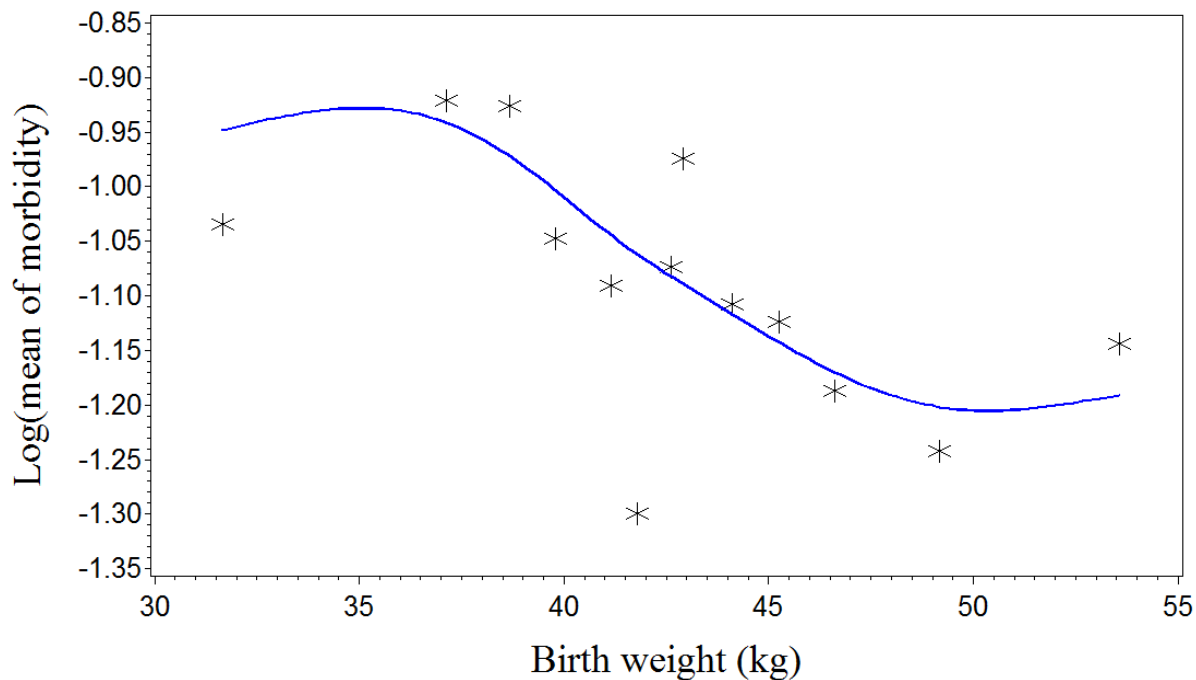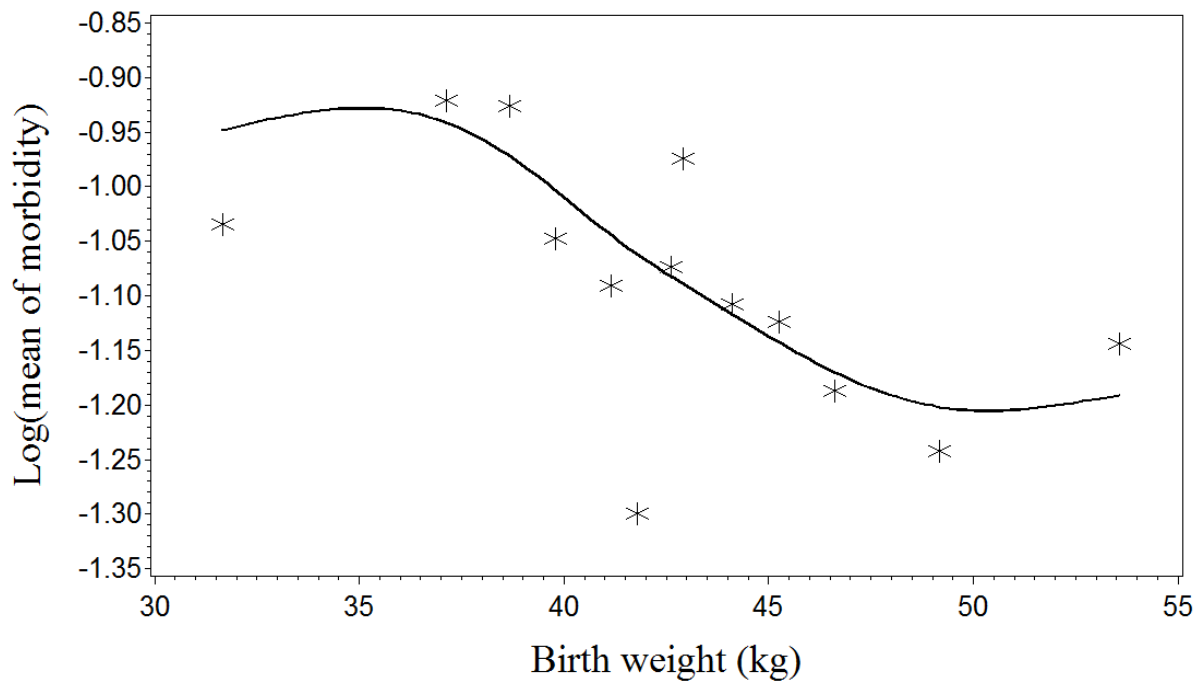

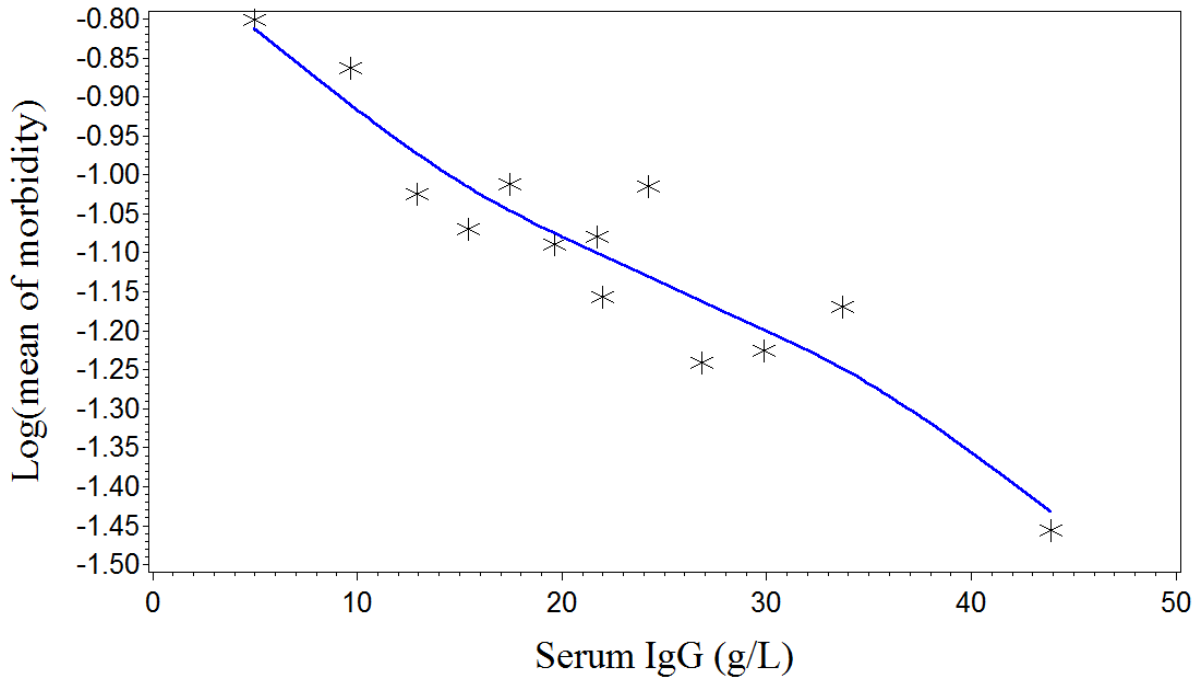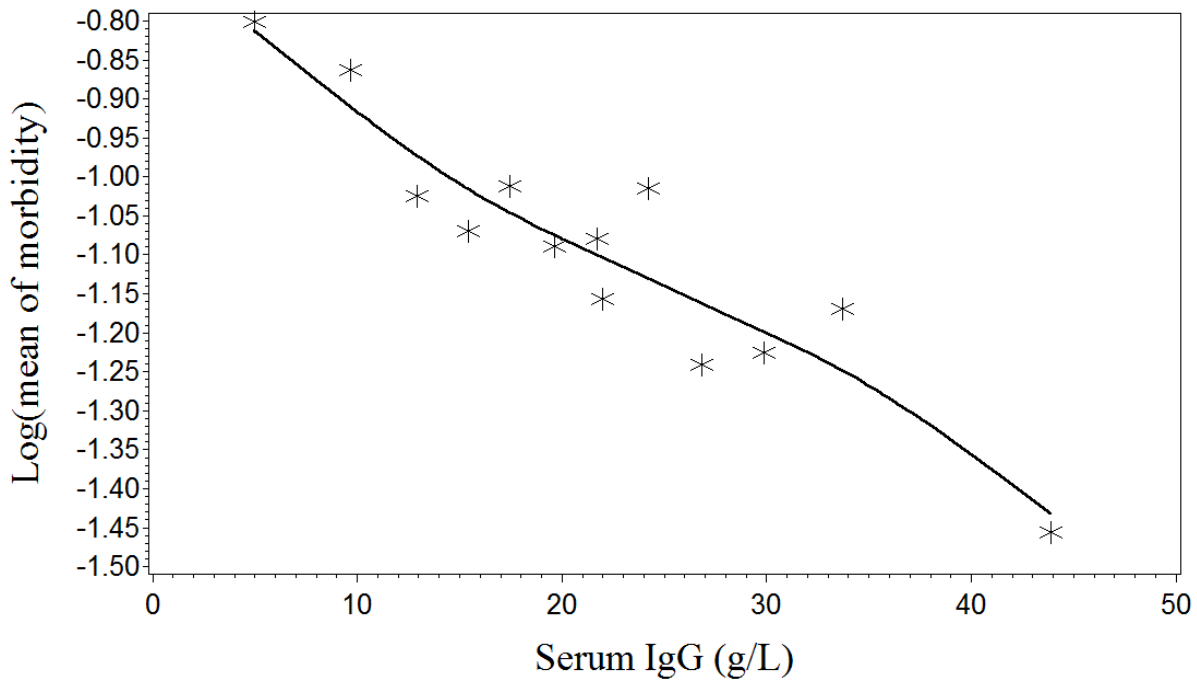

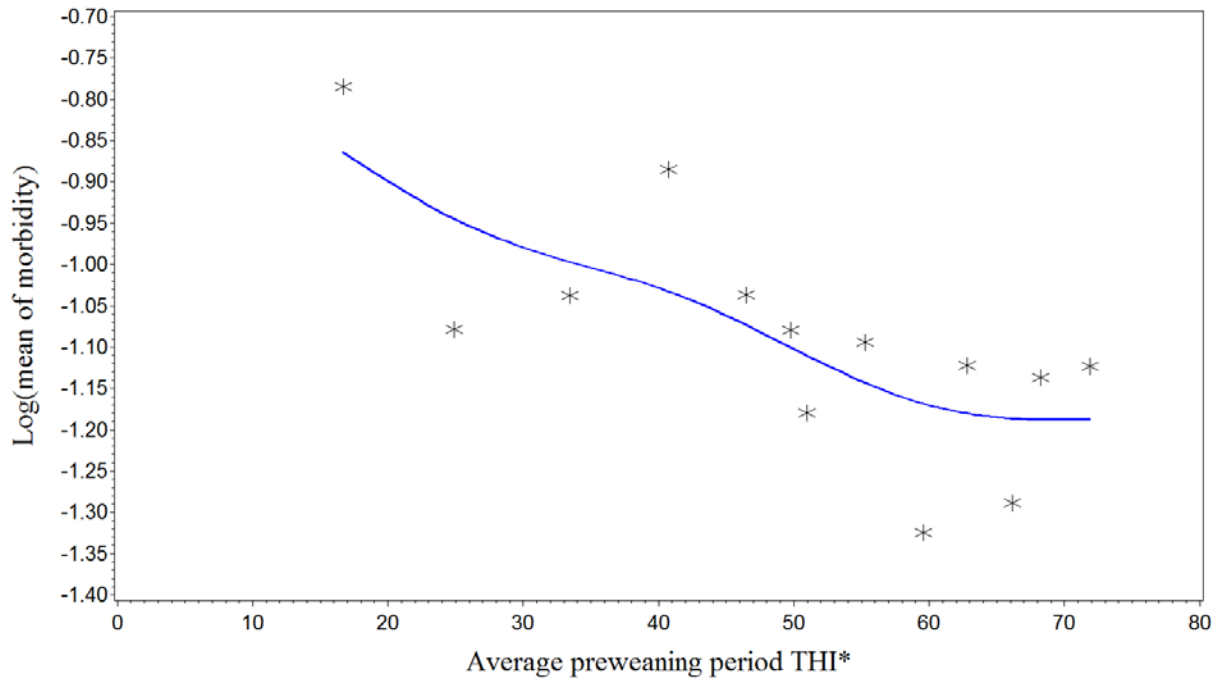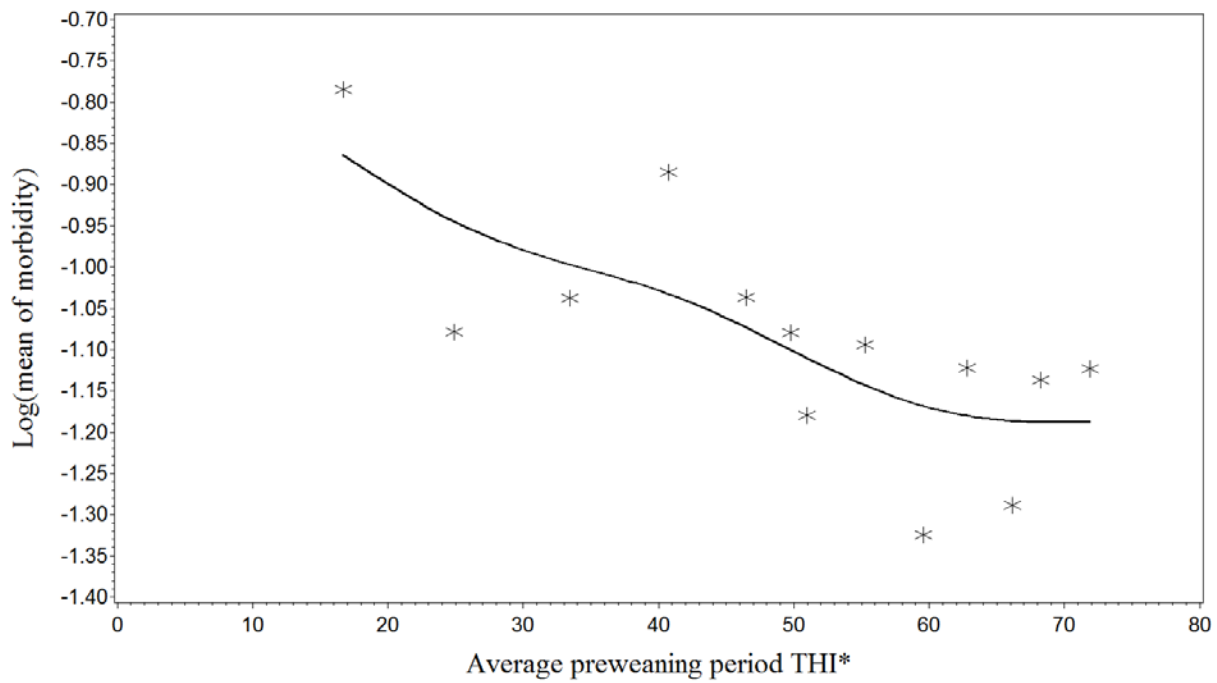



**Supplemental Figure S2.** Predicted mortality risk for preweaned heifers by (a) birth weight (kg) and (b) serum IgG (g/L) concentration grouped into 12 categories.

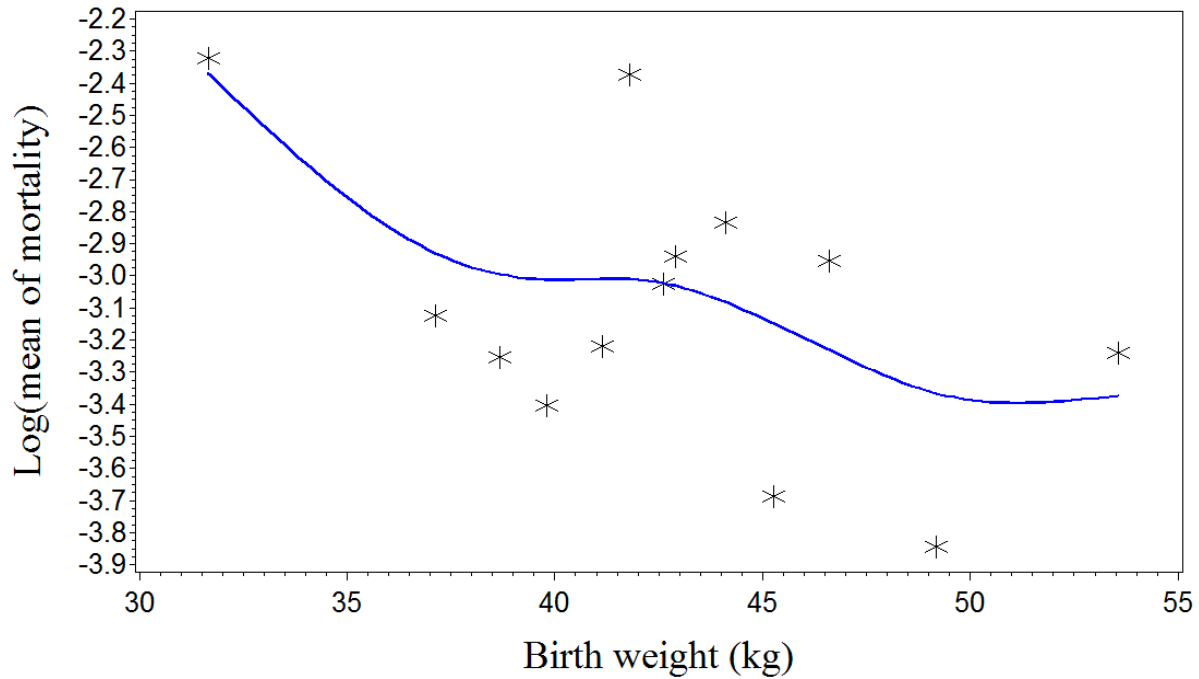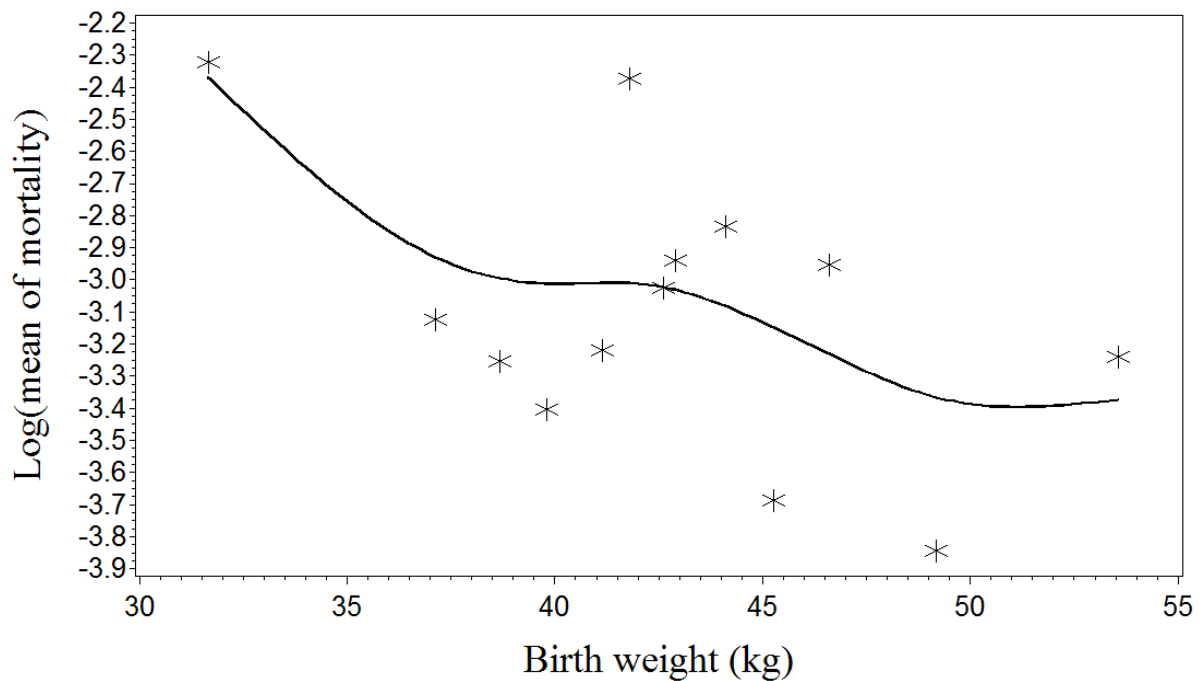

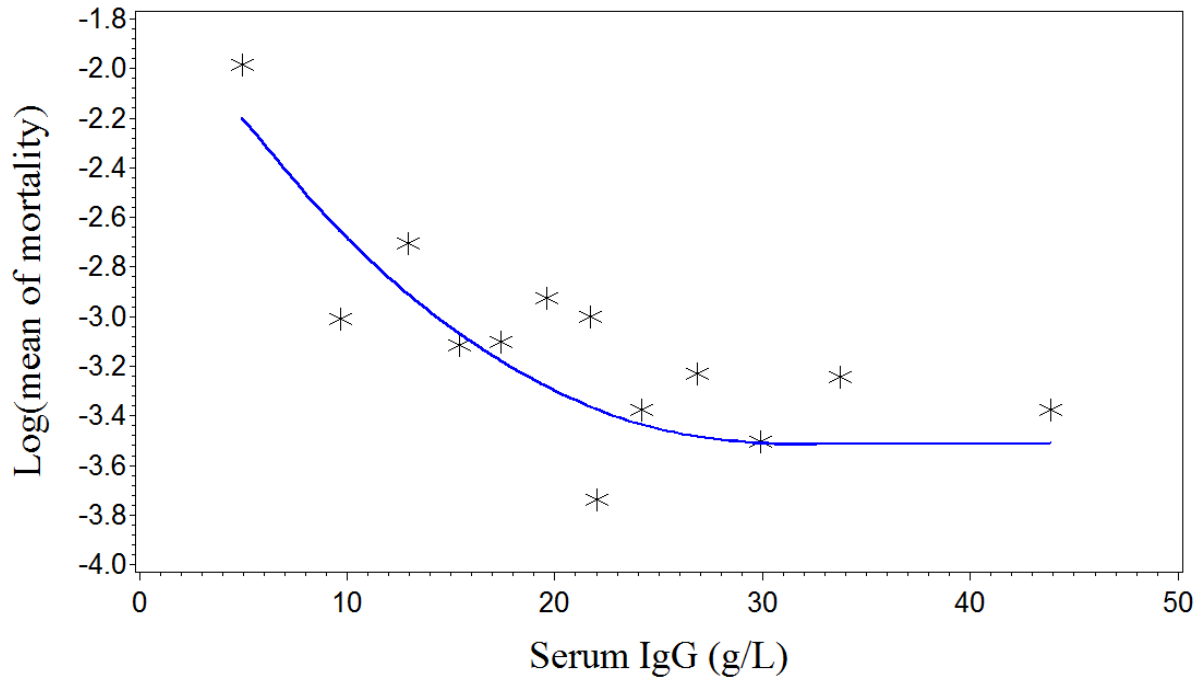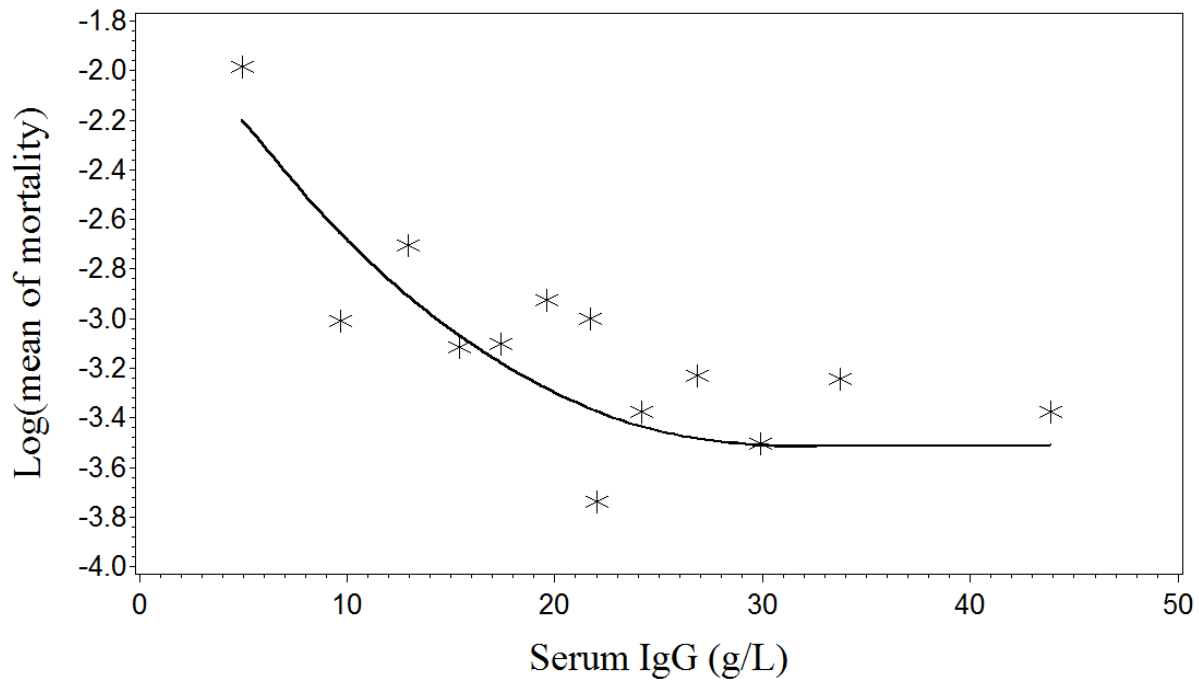

Supplement: mmc1.pdf [file mmc1.pdf]
